# Supplementary material
Source: publisher figshare collection journal article supplement (https://tandf.figshare.com/articles/dataset/_/12378101)
Supplement: Supplementary file 1 [file 2]

Archive with 2 entries (2 files):
- Supplemental_File_for_Publication_clean.docx
- Supplemental_File_for_Publication_clean.pdf
